# Supplementary material for: The Effect of Loneliness on Cognitive Functioning Among Healthy Individuals in Mid- and Late-Adulthood: Evidence From the Canadian Longitudinal Study on Aging (CLSA)
Source: PubMed Central journal article supplement (PMC8448416; doi:10.3389/fpsyg.2021.701305), 2021-09-03
Supplement: Data_Sheet_1.pdf [file Data_Sheet_1.pdf]

## Supplementary Material

### SUPPLEMENTARY MATERIALS S1

In this section, we present the summary tables pertaining to the survey-weighted regression models that were fitted on the baseline data. The table of coefficients of the survey-weighted regression model on REY 1 at baseline is given in Table S1. As the categorical independent variables were treatment encoded, the baseline level of a given independent variable is part of the intercept.

**Table S1.** Table of coefficients of the survey-weighted regression model fitted to immediate recall scores (REY 1) at baseline.

| Variable      | Est.   | SE    | t-value | p-value |
|---------------|--------|-------|---------|---------|
| Intercept     | 4.668  | 0.212 | 22.010  | <0.001  |
| Marital_2     | 0.124  | 0.069 | 1.795   | 0.073   |
| Marital_3     | 0.113  | 0.093 | 1.222   | 0.222   |
| Marital_4     | 0.232  | 0.086 | 2.677   | 0.007   |
| Marital_5     | 0.093  | 0.131 | 0.707   | 0.480   |
| Sex_M         | -0.853 | 0.037 | -23.022 | <0.001  |
| Age           | -0.932 | 0.048 | -19.501 | <0.001  |
| Retired_2     | 0.023  | 0.057 | 0.407   | 0.684   |
| Retired_3     | -0.112 | 0.050 | -2.234  | 0.026   |
| Urban/Rural_1 | 0.072  | 0.062 | 1.159   | 0.247   |
| Urban/Rural_2 | -0.018 | 0.123 | -0.148  | 0.882   |
| Urban/Rural_4 | 0.228  | 0.209 | 1.089   | 0.276   |
| Urban/Rural_6 | -0.213 | 0.130 | -1.639  | 0.101   |
| Urban/Rural_9 | -0.031 | 0.213 | -0.146  | 0.884   |
| Lonely_Often  | -0.781 | 0.299 | -2.615  | 0.009   |
| Education_2   | 0.327  | 0.200 | 1.633   | 0.103   |
| Education_3   | 0.364  | 0.224 | 1.625   | 0.104   |
| Education_4   | 0.659  | 0.168 | 3.917   | <0.001  |
| Education_5   | 1.028  | 0.172 | 5.987   | <0.001  |
| Education_6   | 0.570  | 0.167 | 3.405   | 0.001   |
| Education_7   | 0.775  | 0.164 | 4.717   | <0.001  |

Continued on next page

Table S1 –continued from previous page

| Variable                  | Est.   | SE    | t-value | p-value |
|---------------------------|--------|-------|---------|---------|
| Education_8               | 0.948  | 0.182 | 5.210   | <0.001  |
| Education_9               | 1.212  | 0.164 | 7.394   | <0.001  |
| Education_10              | 1.346  | 0.166 | 8.120   | <0.001  |
| Education_11              | 1.657  | 0.300 | 5.525   | <0.001  |
| Number friends            | 0.057  | 0.035 | 1.613   | 0.107   |
| Smoking_2                 | 0.182  | 0.163 | 1.123   | 0.262   |
| Smoking_3                 | -0.001 | 0.315 | -0.002  | 0.998   |
| Smoking_4                 | 0.071  | 0.077 | 0.927   | 0.354   |
| Smoking_5                 | 0.143  | 0.082 | 1.754   | 0.079   |
| Smoking_6                 | 0.211  | 0.079 | 2.656   | 0.008   |
| Alcohol_2                 | -0.084 | 0.067 | -1.250  | 0.212   |
| Alcohol_3                 | -0.143 | 0.058 | -2.457  | 0.014   |
| Alcohol_4                 | -0.069 | 0.068 | -1.010  | 0.312   |
| Alcohol_5                 | -0.091 | 0.073 | -1.248  | 0.212   |
| Alcohol_6                 | -0.158 | 0.085 | -1.875  | 0.061   |
| Alcohol_7                 | -0.248 | 0.077 | -3.241  | 0.001   |
| Alcohol_96                | -0.176 | 0.075 | -2.353  | 0.019   |
| Income_2                  | 0.273  | 0.119 | 2.289   | 0.022   |
| Income_3                  | 0.341  | 0.120 | 2.836   | 0.005   |
| Income_4                  | 0.451  | 0.127 | 3.554   | <0.001  |
| Income_5                  | 0.479  | 0.132 | 3.618   | <0.001  |
| Savings_2                 | -0.134 | 0.062 | -2.167  | 0.030   |
| Savings_3                 | 0.093  | 0.053 | 1.762   | 0.078   |
| Savings_4                 | 0.070  | 0.075 | 0.927   | 0.354   |
| Lonely_Often:Education_2  | 0.837  | 0.407 | 2.055   | 0.040   |
| Lonely_Often:Education_3  | -0.616 | 0.489 | -1.261  | 0.207   |
| Lonely_Often:Education_4  | 0.461  | 0.331 | 1.393   | 0.164   |
| Lonely_Often:Education_5  | 0.353  | 0.338 | 1.042   | 0.297   |
| Lonely_Often:Education_6  | 0.825  | 0.342 | 2.410   | 0.016   |
| Lonely_Often:Education_7  | 0.881  | 0.316 | 2.786   | 0.005   |
| Lonely_Often:Education_8  | 0.956  | 0.375 | 2.551   | 0.011   |
| Lonely_Often:Education_9  | 0.800  | 0.314 | 2.553   | 0.011   |
| Lonely_Often:Education_10 | 0.763  | 0.317 | 2.404   | 0.016   |
| Lonely_Often:Education_11 | 0.055  | 0.432 | 0.128   | 0.898   |

Continued on next page

Table S1 – concluded from previous page

| Variable | Est. | SE | t-value | p-value |
|----------|------|----|---------|---------|
|----------|------|----|---------|---------|

In the remaining survey-weighted regression models, loneliness was not a statistically significant independent variable at baseline. The results of these regression models are presented in Table S2 in the form of an ANOVA summary table.

**Table S2.** The sequential ANOVA summary table of the survey-weighted regression models at baseline.

| Cognitive test    | Variable          | $X^2$    | <i>df</i> | <i>ddf</i> | <i>p</i> -value |
|-------------------|-------------------|----------|-----------|------------|-----------------|
| Rey 2             | Marital           | 359.91   | 4.00      | 12019.00   | <0.001          |
|                   | Sex               | 3303.25  | 1.00      | 12018.00   | <0.001          |
|                   | Age               | 3816.60  | 1.00      | 12017.00   | <0.001          |
|                   | Retired           | 28.94    | 2.00      | 12015.00   | 0.027           |
|                   | Urban/rural       | 158.05   | 5.00      | 12010.00   | <0.001          |
|                   | Education         | 1533.28  | 10.00     | 12000.00   | <0.001          |
|                   | Number of friends | 0.56     | 1.00      | 11999.00   | 0.701           |
|                   | Smoking           | 48.47    | 5.00      | 11994.00   | 0.071           |
|                   | Alcohol           | 805.45   | 7.00      | 11825.00   | <0.001          |
|                   | Income            | 29.58    | 4.00      | 11821.00   | 0.15            |
|                   | Savings           | 1124.80  | 3.00      | 11588.00   | <0.001          |
|                   | Lonely            | 0.01     | 1.00      | 11587.00   | 0.96            |
|                   | AFT 1             | Marital  | 5178.57   | 4.00       | 12089.00        |
| Sex               |                   | 183.49   | 1.00      | 12088.00   | 0.032           |
| Age               |                   | 31577.89 | 1.00      | 12087.00   | <0.001          |
| Retired           |                   | 341.39   | 2.00      | 12085.00   | 0.003           |
| Urban/rural       |                   | 1543.28  | 5.00      | 12080.00   | <0.001          |
| Education         |                   | 16722.07 | 10.00     | 12070.00   | <0.001          |
| Number of friends |                   | 293.89   | 1.00      | 12069.00   | 0.003           |
| Smoking           |                   | 258.48   | 5.00      | 12064.00   | 0.191           |
| Alcohol           |                   | 6286.44  | 7.00      | 11890.00   | <0.001          |
| Income            |                   | 828.77   | 4.00      | 11886.00   | <0.001          |
| Savings           |                   | 6373.08  | 3.00      | 11651.00   | <0.001          |

Continued on next page

Table S2 –continued from previous page

| Cognitive test    | Variable          | $X^2$    | <i>df</i> | <i>ddf</i> | <i>p</i> -value |
|-------------------|-------------------|----------|-----------|------------|-----------------|
| AFT 2             | Lonely            | 10.90    | 1.00      | 11650.00   | 0.566           |
|                   | Marital           | 6820.96  | 4.00      | 12089.00   | <0.001          |
|                   | Sex               | 603.43   | 1.00      | 12088.00   | 0.001           |
|                   | Age               | 39355.20 | 1.00      | 12087.00   | <0.001          |
|                   | Retired           | 464.60   | 2.00      | 12085.00   | 0.003           |
|                   | Urban/rural       | 1967.38  | 5.00      | 12080.00   | <0.001          |
|                   | Education         | 23833.82 | 10.00     | 12070.00   | <0.001          |
|                   | Number of friends | 485.99   | 1.00      | 12069.00   | 0.001           |
|                   | Smoking           | 514.60   | 5.00      | 12064.00   | 0.063           |
|                   | Alcohol           | 8416.72  | 7.00      | 11890.00   | <0.001          |
|                   | Income            | 1042.74  | 4.00      | 11886.00   | <0.001          |
|                   | Savings           | 9105.25  | 3.00      | 11651.00   | <0.001          |
|                   | MAT               | Lonely   | 22.01     | 1.00       | 11650.00        |
| Marital           |                   | 8421.79  | 4.00      | 11873.00   | <0.001          |
| Sex               |                   | 3991.80  | 1.00      | 11872.00   | <0.001          |
| Age               |                   | 36852.93 | 1.00      | 11871.00   | <0.001          |
| Retired           |                   | 405.34   | 2.00      | 11869.00   | 0.036           |
| Urban/rural       |                   | 2358.00  | 5.00      | 11864.00   | <0.001          |
| Education         |                   | 30574.19 | 10.00     | 11854.00   | <0.001          |
| Number of friends |                   | 469.59   | 1.00      | 11853.00   | 0.012           |
| Smoking           |                   | 626.68   | 5.00      | 11848.00   | 0.119           |
| Alcohol           |                   | 11616.56 | 7.00      | 11684.00   | <0.001          |
| Income            |                   | 1309.33  | 4.00      | 11680.00   | 0.002           |
| Savings           |                   | 15265.17 | 3.00      | 11454.00   | <0.001          |
| FAS               |                   | Lonely   | 18.27     | 1.00       | 11453.00        |
|                   | Marital           | 280.45   | 4.00      | 12302.00   | <0.001          |
|                   | Sex               | 408.72   | 1.00      | 12301.00   | <0.001          |
|                   | Age               | 904.80   | 1.00      | 12300.00   | <0.001          |
|                   | Retired           | 38.70    | 2.00      | 12298.00   | 0.011           |
|                   | Urban/rural       | 267.47   | 5.00      | 12293.00   | <0.001          |
|                   | Education         | 3700.62  | 10.00     | 12283.00   | <0.001          |
|                   | Number of friends | 72.62    | 1.00      | 12282.00   | <0.001          |
|                   | Smoking           | 36.78    | 5.00      | 12277.00   | 0.228           |
|                   | Alcohol           | 905.15   | 7.00      | 12099.00   | <0.001          |

Continued on next page

Table S2 –continued from previous page

| Cognitive test | Variable          | $X^2$    | $df$  | $ddf$    | $p$ -value |
|----------------|-------------------|----------|-------|----------|------------|
| TMT            | Income            | 63.46    | 4.00  | 12095.00 | 0.006      |
|                | Savings           | 1231.60  | 3.00  | 11853.00 | <0.001     |
|                | Lonely            | 1.52     | 1.00  | 11852.00 | 0.541      |
|                | Marital           | 4.04     | 4.00  | 12218.00 | <0.001     |
|                | Sex               | 0.12     | 1.00  | 12217.00 | 0.172      |
|                | Age               | 14.27    | 1.00  | 12216.00 | <0.001     |
|                | Retired           | 0.34     | 2.00  | 12214.00 | 0.071      |
|                | Urban/rural       | 0.32     | 5.00  | 12209.00 | 0.451      |
|                | Education         | 0.41     | 10.00 | 12199.00 | 0.823      |
|                | Number of friends | 0.00     | 1.00  | 12198.00 | 0.826      |
|                | Smoking           | 0.55     | 5.00  | 12193.00 | 0.075      |
|                | Alcohol           | 14.29    | 7.00  | 12020.00 | <0.001     |
|                | Income            | 1.24     | 4.00  | 12016.00 | 0.007      |
|                | Savings           | 20.62    | 3.00  | 11776.00 | <0.001     |
| PMT            | Lonely            | 0.34     | 1.00  | 11775.00 | 0.037      |
|                | Marital           | 65.89    | 4.00  | 12277.00 | <0.001     |
|                | Sex               | 2.55     | 1.00  | 12276.00 | 0.133      |
|                | Age               | 596.99   | 1.00  | 12275.00 | <0.001     |
|                | Retired           | 5.55     | 2.00  | 12273.00 | 0.099      |
|                | Urban/rural       | 6.62     | 5.00  | 12268.00 | 0.073      |
|                | Education         | 47.49    | 10.00 | 12258.00 | 0.001      |
|                | Number of friends | 2.79     | 1.00  | 12257.00 | 0.221      |
|                | Smoking           | 8.44     | 5.00  | 12252.00 | 0.157      |
|                | Alcohol           | 147.69   | 7.00  | 12074.00 | <0.001     |
|                | Income            | 11.78    | 4.00  | 12070.00 | 0.035      |
|                | Savings           | 324.81   | 3.00  | 11828.00 | <0.001     |
|                | Lonely            | 6.98     | 1.00  | 11827.00 | 0.023      |
|                | Marital           | 11051.00 | 4.00  | 12302.00 | <0.001     |
| Stroop         | Sex               | 573.36   | 1.00  | 12301.00 | 0.001      |
|                | Age               | 89906.24 | 1.00  | 12300.00 | <0.001     |
|                | Retired           | 498.01   | 2.00  | 12298.00 | 0.004      |
|                | Urban/rural       | 1688.74  | 5.00  | 12293.00 | 0.006      |
|                | Education         | 17735.46 | 10.00 | 12283.00 | <0.001     |
|                | Number of friends | 531.47   | 1.00  | 12282.00 | <0.001     |

Continued on next page

Table S2 – concluded from previous page

---

| Cognitive test | Variable | $X^2$    | <i>df</i> | <i>ddf</i> | <i>p</i> -value |
|----------------|----------|----------|-----------|------------|-----------------|
|                | Smoking  | 738.84   | 5.00      | 12277.00   | 0.004           |
|                | Alcohol  | 10904.60 | 7.00      | 12099.00   | <0.001          |
|                | Income   | 1246.72  | 4.00      | 12095.00   | <0.001          |
|                | Savings  | 13267.16 | 3.00      | 11853.00   | <0.001          |
|                | Lonely   | 54.30    | 1.00      | 11852.00   | 0.242           |

---

## SUPPLEMENTARY MATERIALS S2

In this section, we provide the table of coefficients for those fitted survey-weighted regression models in which loneliness was a statistically significant independent variable at follow-up.

The table of coefficients of the survey-weighted model for the time-based memory test (TMT) is provided in Table S3.

**Table S3.** Table of coefficients of the survey-weighted regression model for time-based memory test (TMT) at follow-up.

| Variable             | Est.   | SE    | t-value | p-value |
|----------------------|--------|-------|---------|---------|
| (Intercept)          | 8.171  | 0.244 | 33.542  | 0.000   |
| TMT score (baseline) | 0.138  | 0.020 | 7.010   | 0.000   |
| Marital_2            | -0.004 | 0.034 | -0.127  | 0.899   |
| Marital_3            | 0.003  | 0.053 | 0.065   | 0.948   |
| Marital_4            | 0.018  | 0.043 | 0.427   | 0.669   |
| Marital_5            | -0.006 | 0.062 | -0.094  | 0.925   |
| Sex_M                | -0.003 | 0.016 | -0.211  | 0.833   |
| Age                  | -0.013 | 0.002 | -8.411  | 0.000   |
| Retired_2            | -0.021 | 0.029 | -0.747  | 0.455   |
| Retired_3            | -0.013 | 0.023 | -0.552  | 0.581   |
| Urban/Rural_1        | 0.074  | 0.037 | 2.015   | 0.044   |
| Urban/Rural_2        | 0.056  | 0.062 | 0.902   | 0.367   |
| Urban/Rural_4        | 0.104  | 0.062 | 1.666   | 0.096   |
| Urban/Rural_6        | 0.066  | 0.059 | 1.124   | 0.261   |
| Urban/Rural_9        | -0.014 | 0.075 | -0.185  | 0.853   |
| Education_2          | -0.045 | 0.134 | -0.335  | 0.738   |
| Education_3          | -0.073 | 0.133 | -0.545  | 0.586   |
| Education_4          | -0.043 | 0.109 | -0.399  | 0.690   |
| Education_5          | -0.070 | 0.108 | -0.648  | 0.517   |
| Education_6          | -0.063 | 0.107 | -0.584  | 0.559   |
| Education_7          | -0.062 | 0.107 | -0.583  | 0.560   |
| Education_8          | -0.113 | 0.113 | -0.997  | 0.319   |
| Education_9          | -0.108 | 0.107 | -1.010  | 0.312   |

Continued on next page

Table S3 – concluded from previous page

| Variable          | Est.   | SE    | t-value | p-value |
|-------------------|--------|-------|---------|---------|
| Education_10      | -0.129 | 0.107 | -1.208  | 0.227   |
| Education_11      | -0.157 | 0.346 | -0.455  | 0.649   |
| Number of friends | -0.001 | 0.001 | -1.037  | 0.300   |
| Smoking_2         | 0.021  | 0.057 | 0.368   | 0.713   |
| Smoking_3         | -0.108 | 0.134 | -0.804  | 0.421   |
| Smoking_4         | 0.029  | 0.035 | 0.842   | 0.400   |
| Smoking_5         | 0.024  | 0.037 | 0.655   | 0.513   |
| Smoking_6         | 0.049  | 0.036 | 1.370   | 0.171   |
| Alcohol_2         | -0.007 | 0.027 | -0.266  | 0.790   |
| Alcohol_3         | -0.018 | 0.024 | -0.771  | 0.441   |
| Alcohol_4         | -0.057 | 0.030 | -1.910  | 0.056   |
| Alcohol_5         | -0.060 | 0.032 | -1.901  | 0.057   |
| Alcohol_6         | -0.043 | 0.037 | -1.177  | 0.239   |
| Alcohol_7         | -0.091 | 0.034 | -2.682  | 0.007   |
| Alcohol_96        | -0.108 | 0.040 | -2.709  | 0.007   |
| Income2           | 0.093  | 0.081 | 1.147   | 0.252   |
| Income3           | 0.164  | 0.080 | 2.055   | 0.040   |
| Income4           | 0.181  | 0.082 | 2.208   | 0.027   |
| Income5           | 0.184  | 0.083 | 2.215   | 0.027   |
| Savings2          | -0.007 | 0.028 | -0.236  | 0.813   |
| Savings3          | 0.014  | 0.024 | 0.611   | 0.541   |
| Savings4          | 0.048  | 0.030 | 1.575   | 0.115   |
| Lonely_Often      | -0.078 | 0.024 | -3.255  | 0.001   |



The table of coefficients of the survey-weighted model for the event-based memory test (PMT) is provided in Table S4.

**Table S4.** Table of coefficients of the survey-weighted regression model for event-based memory test (PMT) at follow-up.

| Variable             | Est.   | SE    | t-value | p-value |
|----------------------|--------|-------|---------|---------|
| (Intercept)          | 8.687  | 0.247 | 35.169  | 0.000   |
| PMT score (baseline) | 0.131  | 0.014 | 9.528   | 0.000   |
| Marital_2            | 0.007  | 0.031 | 0.218   | 0.828   |
| Marital_3            | -0.141 | 0.057 | -2.470  | 0.014   |
| Marital_4            | -0.008 | 0.041 | -0.200  | 0.841   |
| Marital_5            | 0.000  | 0.052 | 0.004   | 0.997   |
| Sex_M                | -0.009 | 0.016 | -0.572  | 0.567   |
| Age                  | -0.021 | 0.002 | -12.925 | 0.000   |
| Retired_2            | -0.020 | 0.033 | -0.607  | 0.544   |
| Retired_3            | -0.075 | 0.027 | -2.806  | 0.005   |
| Urban/Rural_1        | -0.000 | 0.032 | -0.010  | 0.992   |
| Urban/Rural_2        | 0.027  | 0.053 | 0.501   | 0.617   |
| Urban/Rural_4        | 0.019  | 0.074 | 0.252   | 0.801   |
| Urban/Rural_6        | 0.024  | 0.059 | 0.406   | 0.685   |
| Urban/Rural_9        | -0.057 | 0.079 | -0.720  | 0.472   |
| Education_2          | 0.264  | 0.194 | 1.365   | 0.172   |
| Education_3          | 0.318  | 0.195 | 1.631   | 0.103   |
| Education_4          | 0.347  | 0.172 | 2.018   | 0.044   |
| Education_5          | 0.378  | 0.172 | 2.204   | 0.028   |
| Education_6          | 0.331  | 0.171 | 1.933   | 0.053   |
| Education_7          | 0.349  | 0.170 | 2.052   | 0.040   |
| Education_8          | 0.393  | 0.173 | 2.277   | 0.023   |
| Education_9          | 0.369  | 0.170 | 2.174   | 0.030   |
| Education_10         | 0.360  | 0.170 | 2.121   | 0.034   |
| Education_11         | 0.517  | 0.180 | 2.868   | 0.004   |
| Number of friends    | -0.003 | 0.002 | -1.305  | 0.192   |

Continued on next page

Table S4 – concluded from previous page

| Variable     | Est.   | SE    | t-value | p-value |
|--------------|--------|-------|---------|---------|
| Smoking_2    | 0.107  | 0.049 | 2.192   | 0.028   |
| Smoking_3    | -0.010 | 0.092 | -0.113  | 0.910   |
| Smoking_4    | 0.017  | 0.035 | 0.480   | 0.631   |
| Smoking_5    | -0.025 | 0.037 | -0.664  | 0.507   |
| Smoking_6    | 0.007  | 0.036 | 0.196   | 0.845   |
| Alcohol_2    | -0.020 | 0.029 | -0.709  | 0.478   |
| Alcohol_3    | -0.046 | 0.024 | -1.928  | 0.054   |
| Alcohol_4    | -0.009 | 0.028 | -0.313  | 0.754   |
| Alcohol_5    | -0.056 | 0.031 | -1.782  | 0.075   |
| Alcohol_6    | -0.061 | 0.038 | -1.633  | 0.102   |
| Alcohol_7    | -0.082 | 0.036 | -2.287  | 0.022   |
| Alcohol_96   | -0.068 | 0.038 | -1.821  | 0.069   |
| Income_2     | -0.039 | 0.070 | -0.562  | 0.574   |
| Income_3     | -0.021 | 0.068 | -0.315  | 0.752   |
| Income_4     | -0.016 | 0.069 | -0.231  | 0.817   |
| Income_5     | -0.022 | 0.071 | -0.307  | 0.759   |
| Savings_2    | -0.016 | 0.029 | -0.552  | 0.581   |
| Savings_3    | 0.025  | 0.023 | 1.056   | 0.291   |
| Savings_4    | 0.035  | 0.033 | 1.070   | 0.285   |
| Lonely_often | -0.068 | 0.023 | -2.994  | 0.003   |

### SUPPLEMENTARY MATERIALS S3

The summary information of the survey-weighted regression models where loneliness was not a statistically significant predictor at follow-up is provided in Table S5 in the form of a sequential ANOVA table.

**Table S5.** The sequential ANOVA summary tables of the survey-weighted regression models at follow-up.

| Cognitive test    | Variable          | $X^2$          | <i>df</i> | <i>ddf</i> | <i>p</i> -value |
|-------------------|-------------------|----------------|-----------|------------|-----------------|
| REY 1             | Baseline score    | 16513.69       | 1.00      | 12005.00   | <0.001          |
|                   | Marital           | 117.11         | 4.00      | 12001.00   | <0.001          |
|                   | Sex               | 1084.93        | 1.00      | 12000.00   | <0.001          |
|                   | Age               | 1969.19        | 1.00      | 11999.00   | <0.001          |
|                   | Retired           | 39.60          | 2.00      | 11997.00   | 0.003           |
|                   | Urban/rural       | 16.52          | 5.00      | 11992.00   | 0.418           |
|                   | Education         | 580.33         | 10.00     | 11982.00   | <0.001          |
|                   | Number of friends | 0.69           | 1.00      | 11981.00   | 0.645           |
|                   | Smoking           | 28.83          | 5.00      | 11976.00   | 0.141           |
|                   | Alcohol           | 30.79          | 7.00      | 11969.00   | 0.276           |
|                   | Income            | 16.50          | 4.00      | 11965.00   | 0.291           |
|                   | Savings           | 630.06         | 3.00      | 11729.00   | <0.001          |
|                   | Lonely            | 0.14           | 1.00      | 11728.00   | 0.835           |
|                   | Rey 2             | Baseline score | 24051.81  | 1.00       | 12022.00        |
| Marital           |                   | 152.39         | 4.00      | 12018.00   | <0.001          |
| Sex               |                   | 1145.57        | 1.00      | 12017.00   | <0.001          |
| Age               |                   | 2508.22        | 1.00      | 12016.00   | <0.001          |
| Retired           |                   | 21.76          | 2.00      | 12014.00   | 0.057           |
| Urban/rural       |                   | 20.55          | 5.00      | 12009.00   | 0.463           |
| Education         |                   | 748.53         | 10.00     | 11999.00   | <0.001          |
| Number of friends |                   | 2.19           | 1.00      | 11998.00   | 0.5             |
| Smoking           |                   | 52.10          | 5.00      | 11993.00   | 0.029           |
| Alcohol           |                   | 33.22          | 7.00      | 11986.00   | 0.345           |
| Income            |                   | 13.88          | 4.00      | 11982.00   | 0.464           |
| Savings           |                   | 766.69         | 3.00      | 11746.00   | <0.001          |

Continued on next page

Table S5 –continued from previous page

| Cognitive test    | Variable          | $X^2$     | <i>df</i> | <i>ddf</i> | <i>p</i> -value |
|-------------------|-------------------|-----------|-----------|------------|-----------------|
| AFT 1             | Lonely            | 3.26      | 1.00      | 11745.00   | 0.391           |
|                   | Baseline score    | 125962.95 | 1.00      | 12092.00   | <0.001          |
|                   | Marital           | 1077.95   | 4.00      | 12088.00   | <0.001          |
|                   | Sex               | 3.42      | 1.00      | 12087.00   | 0.687           |
|                   | Age               | 6380.64   | 1.00      | 12086.00   | <0.001          |
|                   | Retired           | 113.45    | 2.00      | 12084.00   | 0.054           |
|                   | Urban/rural       | 184.16    | 5.00      | 12079.00   | 0.06            |
|                   | Education         | 1879.81   | 10.00     | 12069.00   | <0.001          |
|                   | Number of friends | 4.13      | 1.00      | 12068.00   | 0.761           |
|                   | Smoking           | 59.28     | 5.00      | 12063.00   | 0.718           |
|                   | Alcohol           | 272.13    | 7.00      | 12056.00   | 0.072           |
|                   | Income            | 70.47     | 4.00      | 12052.00   | 0.458           |
|                   | Savings           | 4491.49   | 3.00      | 11812.00   | <0.001          |
|                   | AFT 2             | Lonely    | 5.40      | 1.00       | 11811.00        |
| Baseline score    |                   | 176870.19 | 1.00      | 12092.00   | <0.001          |
| Marital           |                   | 1392.85   | 4.00      | 12088.00   | <0.001          |
| Sex               |                   | 150.94    | 1.00      | 12087.00   | 0.02            |
| Age               |                   | 7068.81   | 1.00      | 12086.00   | <0.001          |
| Retired           |                   | 176.84    | 2.00      | 12084.00   | 0.025           |
| Urban/rural       |                   | 172.07    | 5.00      | 12079.00   | 0.167           |
| Education         |                   | 2386.63   | 10.00     | 12069.00   | <0.001          |
| Number of friends |                   | 2.02      | 1.00      | 12068.00   | 0.844           |
| Smoking           |                   | 94.67     | 5.00      | 12063.00   | 0.593           |
| Alcohol           |                   | 426.84    | 7.00      | 12056.00   | 0.022           |
| Income            |                   | 70.52     | 4.00      | 12052.00   | 0.565           |
| Savings           |                   | 5918.15   | 3.00      | 11812.00   | <0.001          |
| MAT               |                   | Lonely    | 15.00     | 1.00       | 11811.00        |
|                   | Baseline score    | 303265.37 | 1.00      | 11876.00   | <0.001          |
|                   | Marital           | 2255.25   | 4.00      | 11872.00   | <0.001          |
|                   | Sex               | 509.60    | 1.00      | 11871.00   | <0.001          |
|                   | Age               | 13291.53  | 1.00      | 11870.00   | <0.001          |
|                   | Retired           | 154.93    | 2.00      | 11868.00   | 0.1             |
|                   | Urban/rural       | 138.88    | 5.00      | 11863.00   | 0.58            |
| Education         | 3298.22           | 10.00     | 11853.00  | <0.001     |                 |

Continued on next page

Table S5 – concluded from previous page

| Cognitive test | Variable          | $X^2$      | <i>df</i> | <i>ddf</i> | <i>p</i> -value |
|----------------|-------------------|------------|-----------|------------|-----------------|
| FAS            | Number of friends | 116.79     | 1.00      | 11852.00   | 0.068           |
|                | Smoking           | 510.06     | 5.00      | 11847.00   | 0.043           |
|                | Alcohol           | 234.38     | 7.00      | 11840.00   | 0.49            |
|                | Income            | 535.42     | 4.00      | 11836.00   | 0.003           |
|                | Savings           | 6649.45    | 3.00      | 11606.00   | <0.001          |
|                | Lonely            | 6.57       | 1.00      | 11605.00   | 0.649           |
|                | Baseline score    | 1000602.33 | 1.00      | 12305.00   | <0.001          |
|                | Marital           | 1162.29    | 4.00      | 12301.00   | 0.001           |
|                | Sex               | 2006.32    | 1.00      | 12300.00   | <0.001          |
|                | Age               | 4280.27    | 1.00      | 12299.00   | <0.001          |
|                | Retired           | 288.95     | 2.00      | 12297.00   | 0.145           |
|                | Urban/rural       | 1165.12    | 5.00      | 12292.00   | 0.013           |
|                | Education         | 12594.86   | 10.00     | 12282.00   | <0.001          |
|                | Number of friends | 485.79     | 1.00      | 12281.00   | 0.009           |
|                | Smoking           | 803.98     | 5.00      | 12276.00   | 0.074           |
| Stroop         | Alcohol           | 1308.14    | 7.00      | 12269.00   | 0.017           |
|                | Income            | 190.31     | 4.00      | 12265.00   | 0.614           |
|                | Savings           | 13878.17   | 3.00      | 12018.00   | <0.001          |
|                | Lonely            | 135.45     | 1.00      | 12017.00   | 0.162           |
|                | Baseline score    | 253863.05  | 1.00      | 12305.00   | <0.001          |
|                | Marital           | 3148.39    | 4.00      | 12301.00   | <0.001          |
|                | Sex               | 221.70     | 1.00      | 12300.00   | 0.02            |
|                | Age               | 22914.19   | 1.00      | 12299.00   | <0.001          |
|                | Retired           | 51.49      | 2.00      | 12297.00   | 0.474           |
|                | Urban/rural       | 1182.36    | 5.00      | 12292.00   | <0.001          |
|                | Education         | 3459.63    | 10.00     | 12282.00   | <0.001          |
|                | Number of friends | 27.89      | 1.00      | 12281.00   | 0.386           |
|                | Smoking           | 541.38     | 5.00      | 12276.00   | 0.014           |
|                | Alcohol           | 797.14     | 7.00      | 12269.00   | 0.005           |
|                | Income            | 660.08     | 4.00      | 12265.00   | 0.049           |
| Savings        | 17534.82          | 3.00       | 12018.00  | <0.001     |                 |
| Lonely         | 14.40             | 1.00       | 12017.00  | 0.531      |                 |
